# Supplementary material for: Nrf2 Ablation Promotes Alzheimer’s Disease-Like Pathology in APP/PS1 Transgenic Mice: The Role of Neuroinflammation and Oxidative Stress
Source: Hindawi journal article supplement (doi:10.1155/2020/3050971), 2020-05-11
Supplement: f1 [file 3050971.f1.pdf]

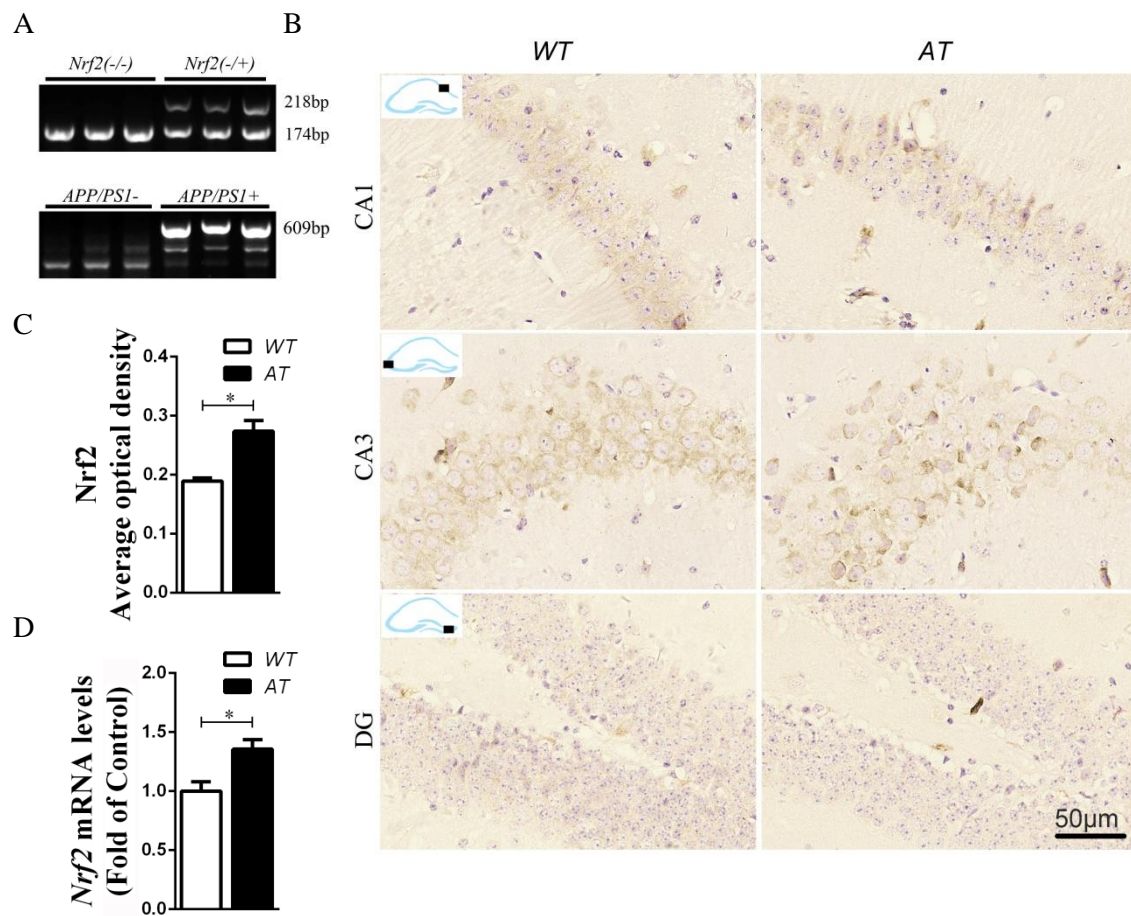

Figure S1: Enhanced level of Nrf2 in the hippocampus in the APP/PS1 mice. (A) Nrf2 mice genotype (upper, n=3/genotype) and APP/PS1 mice genotype (lower, n=3/genotype). (B) Immunohistochemical staining with anti-Nrf2 in hippocampus CA1, CA3 and DG in the WT (*APP/PS1*<sup>-/-</sup>, *Nrf2*<sup>+/-</sup>) and AT (*APP/PS1*<sup>+/-</sup>, *Nrf2*<sup>+/-</sup>) genotype mice (scale=50µm). (C) Average optical density of Nrf2 immunoreactivity in hippocampus was significantly different between WT (*APP/PS1*<sup>-/-</sup>, *Nrf2*<sup>+/-</sup>) and AT (*APP/PS1*<sup>+/-</sup>, *Nrf2*<sup>+/-</sup>) genotype mice (n=3/genotype, \*P < 0.05). (D) qRT-PCR determination of hippocampus Nrf2 mRNA levels showed significantly between WT (*APP/PS1*<sup>-/-</sup>, *Nrf2*<sup>+/-</sup>) and AT (*APP/PS1*<sup>+/-</sup>, *Nrf2*<sup>+/-</sup>) genotype mice (n=5/genotype, \*P < 0.05). Data is represented as means±SD and were analysed by t-test (C, D).

Table.S1 The information of mice and their use for various protocols

|                    | MWM |   | IHC/IF |   | qRT-PCR |   | ELISA |   |
|--------------------|-----|---|--------|---|---------|---|-------|---|
|                    | M   | F | M      | F | M       | F | M     | F |
| <i>WT</i>          | 4   | 2 | 4      | 2 | 4       | 2 | 0     | 0 |
| <i>Nrf2</i> -KO    | 6   | 2 | 4      | 2 | 4       | 2 | 0     | 0 |
| <i>AT</i>          | 6   | 6 | 3      | 3 | 3       | 3 | 3     | 2 |
| <i>AT/Nrf2</i> -KO | 6   | 7 | 3      | 3 | 3       | 3 | 2     | 3 |

Table S1: We generated four genotypes (WT, Nrf2-KO, AT and AT/Nrf2-KO). The number represented the number of mice with different genotypes in the corresponding experiments. MWM: Morris water maze test; IHC/IF: Immunohistochemistry/ immunofluorescence; qRT-PCR: quantitative real-time PCR; ELISA: enzyme-linked immunosorbent assay; M: male; F: female; WT: wild-type mice (APP/PS1<sup>-/-</sup>, Nrf2<sup>+/-</sup>); Nrf2-KO: Nrf2-knockout mice (APP/PS1<sup>-/-</sup>, Nrf2<sup>-/-</sup>); AT: APP/PS1 transgenic mice (APP/PS1<sup>+/-</sup>, Nrf2<sup>+/-</sup>); AT/Nrf2-KO: APP/PS1/Nrf2-knockout mice (APP/PS1<sup>+/-</sup>, Nrf2<sup>-/-</sup>).
